# Supplementary material
Source: Springer Nature journal article supplement (https://www.springermedizin.de/resource/supplementary/12913_2010_1532_MOESM2_ESM.pdf/9528632)
Supplement: MOESM2 [file 9528632]

BASELINE  
ASSESSMENT

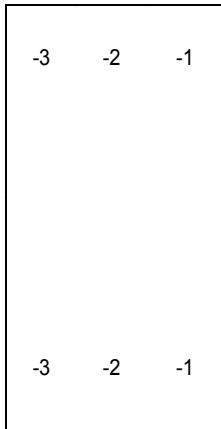

EFFECTIVENESS  
ASSESSMENT

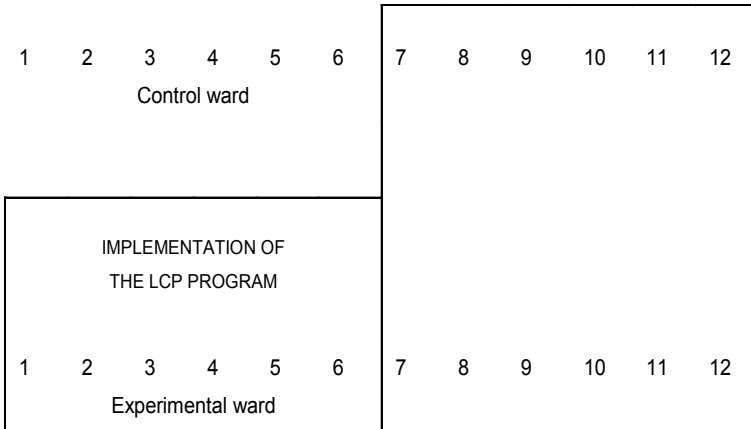

Organisational  
Procedures

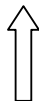

RANDOMISATION  
(Time 0)
